# Supplementary material for: Identification of mRNA Prognostic Markers for TGCT by Integration of Co-Expression and CeRNA Network
Source: Front Endocrinol (Lausanne). 2021 Sep 21;12:743155. doi: 10.3389/fendo.2021.743155 (PMC8491582; doi:10.3389/fendo.2021.743155)
Supplement: Supplementary file 1 [file Table_1.xlsx]

## Sheet: Sheet1
Supplementary Table 1. Clinical case information of TCGA
submitter_id.samples	age_at_initial_pathologic_diagnosis	batch_number	bcr	bcr_followup_barcode	bcr_followup_uuid	submitter_id	bilateral_diagnosis_timing_type	clinical_M	clinical_N	clinical_T	clinical_stage	day_of_dcc_upload	day_of_form_completion	days_to_bilateral_tumor_dx	days_to_initial_pathologic_diagnosis	days_to_post_orchi_serum_test	days_to_pre_orchi_serum_test	eastern_cancer_oncology_group	family_history_other_cancer	family_history_testicular_cancer	file_uuid	first_treatment_success	history_fertility	history_hypospadias	history_of_neoadjuvant_treatment	history_of_undescended_testis	igcccg_stage	informed_consent_verified	init_pathology_dx_method_other	initial_pathologic_diagnosis_method	intratubular_germ_cell_neoplasm	karnofsky_performance_score	laterality	level_of_non_descent	lost_follow_up	lymphovascular_invasion_present	month_of_dcc_upload	month_of_form_completion	other_dx	pathologic_M	pathologic_N	pathologic_T	patient_death_reason	patient_id	person_neoplasm_cancer_status	post_orchi_afp	post_orchi_hcg	post_orchi_ldh	post_orchi_lh
TCGA-YU-A90Y-01A	23	430.36.0	Nationwide Children's Hospital			TCGA-YU-A90Y		M1b	N3		Stage IIIC	22			0		-16		NO	NO	20DDFAE6-99C9-456B-8A9E-EDF25CA33D3C	Progressive Tumor Mass and Tumor Markers		NO	No	No	Poor	YES		Orchiectomy	Present		Left			YES	12		No			T3		A90Y
TCGA-2G-AAF8-01A	33	430.36.0	Nationwide Children's Hospital	TCGA-2G-AAF8-F62972	ADE28994-5FF7-414A-873E-6B33D094B61A	TCGA-2G-AAF8	Metachronous	M0	N0	T1	Stage IA	22	29	3149	0	31	-3	0	NO	YES	61D76913-8418-4C4E-AF1D-5097261F6444	No Measureable Tumor or Tumor Markers	Fathered > or = 1 child by natural conception	NO	No	No		YES		Orchiectomy	Absent	90	Bilateral		NO	NO	12	7	No	M0	N0	T1		AAF8	TUMOR FREE	2	0.1	154
TCGA-XE-AANR-01A	23	430.36.0	Nationwide Children's Hospital	TCGA-XE-AANR-F67604	F5183476-096F-433E-AB05-67E402859556	TCGA-XE-AANR		M0	N0	T2	Stage I	22	6		0		361	1			EE30A271-ED76-4EEB-8EB2-CA7DFDA884A5		Did not attempt to reproduce	NO	No	No		YES		Orchiectomy	Absent	90	Right		NO	YES	12	11	No	M0	NX	T2		AANR	TUMOR FREE
TCGA-WZ-A7V3-01A	20	430.36.0	Nationwide Children's Hospital	TCGA-WZ-A7V3-F69385	0209D515-8092-499B-9B7A-18A4B24078EA	TCGA-WZ-A7V3		M0	N0			22	31		0	111	-9	0	NO	NO	34B01092-775B-4381-AD8C-3BF84C620AEB			NO	No	No		YES		Orchiectomy	Absent	100	Right		NO	NO	12	7	No		NX	T1		A7V3	TUMOR FREE	3.1	0.5
TCGA-YU-A90S-01A	26	430.36.0	Nationwide Children's Hospital	TCGA-YU-A90S-F65289	F42C4892-1CC1-4309-864D-B6E57BD0F81E	TCGA-YU-A90S		M0	N0		Stage IA	22	27		0	-61	-310		YES	NO	3FE4FB3A-2ED6-4F11-BB6C-DBB53613540E	No Measureable Tumor or Tumor Markers		NO	No	No		YES		Orchiectomy	Absent		Left		YES	NO	12	10	No			T1		A90S		0.83		413
TCGA-VF-A8AD-01A	36	430.36.0	Nationwide Children's Hospital	TCGA-VF-A8AD-F64023	59B6E37D-F4F2-401D-B2AC-957CB84E4B05	TCGA-VF-A8AD		M0	NX	T2	Stage IB	22	16		0	8	-20		YES	NO	59BCE9A3-99BD-4192-BD85-1CF1229EA112	No Measureable Tumor or Tumor Markers	Fathered > or = 1 child by unspecified method	NO	No	No	Good	YES		Orchiectomy	Absent		Left		NO	YES	12	9	No	M0	NX	T2		A8AD	WITH TUMOR	2		160
TCGA-XY-A89B-01A	35	430.36.0	Nationwide Children's Hospital	TCGA-XY-A89B-F66565	9E36FFB1-D511-4BB2-8794-26559990F172	TCGA-XY-A89B		M0	NX	T1	Stage IA	22	21		0	243	-2		YES	NO	C68249CE-D807-4350-ACD2-A2883F77B63B			NO	No	No		YES		Orchiectomy	Present		Right		NO	NO	12	10	No	M0	NX	T1		A89B	TUMOR FREE	3.8		209
TCGA-2G-AAHC-01A	33	430.36.0	Nationwide Children's Hospital	TCGA-2G-AAHC-F63084	45F94A19-414D-4010-A046-D87B845675E6	TCGA-2G-AAHC		M0	N1	T1	Stage IIA	22	31		0	2	-5	0	YES	NO	3D5AFFB9-439F-4A83-832D-6A1731ACD7BA	No Measureable Tumor or Tumor Markers	Did not achieve pregnancy following > or = 12 months of unprotected intercourse	NO	No	Yes; left testicle only	Good	YES		Orchiectomy	Absent	100	Left	Inguinal	NO	NO	12	7	No	M0	NX	T1		AAHC	TUMOR FREE	5	5.3	306
TCGA-2G-AAH8-01A	45	430.36.0	Nationwide Children's Hospital	TCGA-2G-AAH8-F63030	CBEE44FC-B419-4217-94D5-541F8634542D	TCGA-2G-AAH8		M0	N1	T2	Stage IIIC	22	30		0	-8	-8	0	NO	NO	80C8492D-8661-41EE-BC16-14B4BCE51F76	Normalization of Tumor Markers, but Residual Tumor Mass	Did not attempt to reproduce	NO	No	Yes; left testicle only	Intermediate	YES		Orchiectomy	Absent	90	Right	Inguinal	NO	NO	12	7	No	M0	NX	T2		AAH8	TUMOR FREE	63	6599	1435
TCGA-XE-AAO4-01A	40	430.36.0	Nationwide Children's Hospital	TCGA-XE-AAO4-F67597	1F2BCAA4-9B3E-401F-B168-D1D9A74315AC	TCGA-XE-AAO4		M0	N0	T1	Stage IA	22	6		0	352	-9	1			7AB64777-434A-48FA-8BD4-0459A3ADA328	No Measureable Tumor or Tumor Markers			No			YES		Orchiectomy	Absent	90	Left		NO	NO	12	11	No	M0	NX	T1		AAO4	TUMOR FREE	7.6		217
TCGA-2G-AAGV-01A	23	430.36.0	Nationwide Children's Hospital	TCGA-2G-AAGV-F63015	626DAB02-32F5-422F-BBF0-BED237708BEE	TCGA-2G-AAGV		M0	N1	T1	Stage IIA	22	30		0	3	-5	0	NO	NO	7ED9E929-D040-4DF9-A14A-1D43470811BD	No Measureable Tumor or Tumor Markers	Did not attempt to reproduce	NO	No	No	Good	YES		Orchiectomy	Present	100	Left		NO	NO	12	7	No	M0	NX	T1		AAGV	TUMOR FREE	2.6	724.6	276
TCGA-XE-AAOC-01A	31	430.36.0	Nationwide Children's Hospital	TCGA-XE-AAOC-F67606	E7D82125-307E-4828-978E-093158583E52	TCGA-XE-AAOC		M0	N0	T1	Stage IA	22	6		0	270	-4	1			30D628B0-4EC8-458E-8959-624E1EB2B748	No Measureable Tumor or Tumor Markers		NO	No	No		YES		Orchiectomy	Absent	90	Left		NO	NO	12	11	No	M0	NX	T1		AAOC	TUMOR FREE	2.8		139
TCGA-XE-AANV-01A	52	430.36.0	Nationwide Children's Hospital	TCGA-XE-AANV-F67492	EA4B5E35-B570-4AE1-AC31-D4EF1F18411A	TCGA-XE-AANV		M0	NX	T2	Stage IB	22	5		0	1455	-7	1	YES	NO	03AA6E80-B0C4-4E13-A972-313CC4BDE722	No Measureable Tumor or Tumor Markers	Fathered > or = 1 child by natural conception	NO	No	No	Good	YES		Orchiectomy	Absent	90	Left		NO	NO	12	11	No	M0	NX	T2		AANV	TUMOR FREE	27.2		162
TCGA-XE-A8H5-01A	29	430.36.0	Nationwide Children's Hospital	TCGA-XE-A8H5-F67197	AED226A3-1597-4F99-88E1-C7E27B586DFB	TCGA-XE-A8H5		M0	N0	T1	Stage IS	22	31		0	62	-13	1	NO	NO	B240614B-D4E5-4865-B6EF-B546D66E31EE	No Measureable Tumor or Tumor Markers		NO	No	No		YES		Orchiectomy	Absent	90	Right		NO	NO	12	10	No	M0	NX	T1		A8H5	TUMOR FREE	5		162
TCGA-2G-AAG3-01A	53	430.36.0	Nationwide Children's Hospital	TCGA-2G-AAG3-F63275	4276F885-3EC3-433B-ADFF-587945E94033	TCGA-2G-AAG3	Metachronous	M0	N0	T1	Stage IS	22	5	-4872	0	19	-3	1	NO	NO	6C301893-7D4E-4F82-8765-26B1C9FAC3A6	No Measureable Tumor or Tumor Markers	Did not attempt to reproduce	NO	No	No		YES		Orchiectomy	Present	90	Bilateral		NO	YES	12	8	Yes	M0	NX	T2		AAG3	TUMOR FREE	8		336
TCGA-2G-AAFY-01A	24	430.36.0	Nationwide Children's Hospital	TCGA-2G-AAFY-F62379	02025D6E-2370-4266-971C-E4BA5F44C09D	TCGA-2G-AAFY		M0	N1	T2	Stage IIA	22	29		0	11	-3	0		NO	E73473C6-63A4-44E9-AD1C-BAD20015D508	No Measureable Tumor or Tumor Markers	Did not attempt to reproduce	NO	No	No	Good	YES		Orchiectomy	Absent	100	Left		NO	YES	12	7	No	M0	N1	T2		AAFY	TUMOR FREE	3	3.2	234
TCGA-ZM-AA0H-01A	50	430.36.0	Nationwide Children's Hospital	TCGA-ZM-AA0H-F68855	7813EF97-15D4-4E82-ADCF-B5B733EDC566	TCGA-ZM-AA0H		M0	N0	T3	Stage IS	22	31		0	15	-2	1	YES	NO	A67BD221-7807-4E35-A059-D0499E57AB4C	No Measureable Tumor or Tumor Markers	Fathered > or = 1 child by natural conception	NO	No	No		YES		Orchiectomy	Absent	90	Left		NO	YES	12	12	No	M0	NX	T3		AA0H	TUMOR FREE	2.15	8.28	128
TCGA-4K-AAAL-01A	31	430.36.0	Nationwide Children's Hospital	TCGA-4K-AAAL-F70146	DF373768-4CB3-427B-BBE5-D0E1D1E765DB	TCGA-4K-AAAL		M0	N0	T1	Stage IS	22	28		0	25	-25	0	NO	NO	D012C2F5-B8E7-4A10-84E9-8EB610C05DF2	Normalization of Tumor Markers, but Residual Tumor Mass	Fathered > or = 1 child by natural conception	NO	No	No	Good	YES		Orchiectomy	Present	100	Right		NO	YES	12	1	No	M0	N0	T2		AAAL	TUMOR FREE	4.7	0.1	588
TCGA-2G-AAGX-01A	22	430.36.0	Nationwide Children's Hospital	TCGA-2G-AAGX-F63017	ECBCF525-0026-421B-B02F-E5E7765069B4	TCGA-2G-AAGX		M0	N0	T1	Stage IA	22	30		0	17	-4	0	YES	NO	97379A7F-C660-4D2A-B164-CB164972B310	No Measureable Tumor or Tumor Markers	Fathered > or = 1 child by natural conception	NO	No	No		YES		Orchiectomy	Absent	90	Right		NO	NO	12	7	No	M0	N0	T1		AAGX	TUMOR FREE	4		192
TCGA-SN-A84Y-01A	18	430.36.0	Nationwide Children's Hospital	TCGA-SN-A84Y-F63026	F6948E1F-A6F9-4B7E-98C7-180A382196B8	TCGA-SN-A84Y		M0	NX	T2	Stage IS	22	30		0						569A2C14-A449-4012-8B6E-C339DFA1C9DA	Progressive Tumor Mass and Tumor Markers	Did not attempt to reproduce		No	No		YES		Orchiectomy		80	Right		NO	YES	12	7	No	M0	NX	T2		A84Y	WITH TUMOR
TCGA-2G-AAGW-01A	38	430.36.0	Nationwide Children's Hospital	TCGA-2G-AAGW-F63016	85E7FB5D-2364-474A-8F7D-69448E1FFF9D	TCGA-2G-AAGW		M0	N0	T1	Stage IS	22	30		0	73	-6	0			DE5120F0-C105-42F5-8A45-3FE54DA1F232	No Measureable Tumor or Tumor Markers	Fathered > or = 1 child by natural conception	NO	No	No		YES		Orchiectomy	Present	100	Right		NO	NO	12	7	No	M0	N0	T1		AAGW	TUMOR FREE	8	4	336
TCGA-2G-AAG6-01A	24	430.36.0	Nationwide Children's Hospital	TCGA-2G-AAG6-F62386	563FCACE-BEA0-4D60-BD45-D101222B5EE9	TCGA-2G-AAG6		M0	N0	T1	Stage IS	22	30		0	22	-4	0	NO	NO	9D6E9489-3736-4FDB-B7F2-04C6C5D39424	No Measureable Tumor or Tumor Markers	Did not attempt to reproduce	NO	No	Yes; left testicle only		YES		Orchiectomy	Present	100	Left	Inguinal	NO	NO	12	7	No	M0	N0	T1		AAG6	TUMOR FREE	4		279
TCGA-YU-A94I-01A	66	430.36.0	Nationwide Children's Hospital	TCGA-YU-A94I-F67069	FC1EDC34-6610-4CEC-9A57-F3A0953BDB03	TCGA-YU-A94I		M0	N0		Stage IA	22	30		0	55	-39		NO	NO	2F4EF78D-84AB-4C93-9903-6C853E81EC1F	No Measureable Tumor or Tumor Markers		NO	No	No		YES		Orchiectomy	Absent		Left		NO	NO	12	10	No			T1		A94I	TUMOR FREE	17.9	0.2	313
TCGA-2G-AAL7-01A	32	430.36.0	Nationwide Children's Hospital	TCGA-2G-AAL7-F63270	E3E4963A-8339-4CE3-A8A8-A619EEB84475	TCGA-2G-AAL7		M0	N0	T2	Stage IS	22	5		0	-3	-17	0	NO	NO	470D0011-368C-4EB5-88A0-0B0AF8BAAECD	No Measureable Tumor or Tumor Markers	Did not attempt to reproduce	NO	No	No		YES		Orchiectomy	Absent	100	Right		NO	YES	12	8	No	M0	N0	T2		AAL7	TUMOR FREE	3	2.6	332
TCGA-YU-A90W-01A	45	430.36.0	Nationwide Children's Hospital	TCGA-YU-A90W-F67035	D55F125F-247C-4B25-8E14-621193BCD6D3	TCGA-YU-A90W		M0	N0		Stage IA	22	29		0	38	-32		YES	YES	92357CE4-CD11-4A8E-830C-F5507795C011	No Measureable Tumor or Tumor Markers	Did not achieve pregnancy following > or = 12 months of unprotected intercourse	NO	No	No		YES		Orchiectomy	Absent		Right		NO	NO	12	10	No			T1		A90W	TUMOR FREE	1.2	0.2	268
TCGA-2G-AAH4-01A	34	430.36.0	Nationwide Children's Hospital	TCGA-2G-AAH4-F63025	FD498AC0-DF15-4A3F-B7E2-41BA16689E12	TCGA-2G-AAH4		M0	N1	T1	Stage II	22	30		0	1	-10	0	NO	NO	B7582BA4-2D30-4528-B5FD-114C98BD2289	Normalization of Tumor Markers, but Residual Tumor Mass	Fathered > or = 1 child by natural conception	NO	No	No	Intermediate	YES		Orchiectomy	Present	90	Left		NO	NO	12	7	No	M0	NX	T1		AAH4	TUMOR FREE	727	70	230
TCGA-2G-AAFG-01A	30	430.36.0	Nationwide Children's Hospital	TCGA-2G-AAFG-F62365	BD688C3A-3F97-42AF-ACBE-063CFDC34FA9	TCGA-2G-AAFG		M0	N0	T1	Stage IS	22	17		0	49	-3	0	YES	YES	11D229A2-2755-463F-BDEB-A0A0651E0C8D	No Measureable Tumor or Tumor Markers	Fathered > or = 1 child by natural conception	NO	No	No		YES		Orchiectomy	Absent	90	Right		NO	NO	12	7	No	M0	N0	T1		AAFG	TUMOR FREE	3		219
TCGA-2G-AAFG-05A	30	430.36.0	Nationwide Children's Hospital	TCGA-2G-AAFG-F62365	BD688C3A-3F97-42AF-ACBE-063CFDC34FA9	TCGA-2G-AAFG		M0	N0	T1	Stage IS	22	17		0	49	-3	0	YES	YES	11D229A2-2755-463F-BDEB-A0A0651E0C8D	No Measureable Tumor or Tumor Markers	Fathered > or = 1 child by natural conception	NO	No	No		YES		Orchiectomy	Absent	90	Right		NO	NO	12	7	No	M0	N0	T1		AAFG	TUMOR FREE	3		219
TCGA-2G-AAF6-01A	28	430.36.0	Nationwide Children's Hospital	TCGA-2G-AAF6-F62226	056B1B74-D6E8-4225-92BD-35DD53BB5E56	TCGA-2G-AAF6		M0	N0	T1	Stage IS	22	17		0	35	-2	0	NO	NO	00511E88-861D-4C2C-B146-F458FE6BAF68	No Measureable Tumor or Tumor Markers	Did not achieve pregnancy following > or = 12 months of unprotected intercourse	NO	No	No		YES		Orchiectomy	Absent	90	Right		NO	NO	12	7	No	M0	N0	T1		AAF6	TUMOR FREE	1	0.5	192
TCGA-XE-AAO6-01A	47	430.36.0	Nationwide Children's Hospital	TCGA-XE-AAO6-F67599	64497823-F4EF-4EDC-B2EF-9534138B9B05	TCGA-XE-AAO6		M0	N0	T1	Stage IA	22	6		0	10	-2	1			FDD72AFE-1C67-46D5-ABA1-355E95279AEF	No Measureable Tumor or Tumor Markers	Did not attempt to reproduce	NO	No	No		YES		Orchiectomy	Absent	90	Left		NO	NO	12	11	No	M0	NX	T1		AAO6	TUMOR FREE	2.5		177
TCGA-2G-AAGN-01A	41	430.36.0	Nationwide Children's Hospital	TCGA-2G-AAGN-F63008	0149A788-C396-45F0-A02D-45E6D8E990EA	TCGA-2G-AAGN		M0	N1	T2	Stage IIIB	22	30		0	6	-3	0	NO	NO	25A825EB-F545-4B46-95B6-996583030FB7		Fathered > or = 1 child by natural conception	NO	No	No	Good	YES		Orchiectomy	Present	100	Left		NO	YES	12	7	No	M0	N1	T2		AAGN	TUMOR FREE	43	111.1	471
TCGA-2G-AAH0-01A	30	430.36.0	Nationwide Children's Hospital	TCGA-2G-AAH0-F63022	09EC8647-DA2A-4078-A5D6-8D64D9B0F7FE	TCGA-2G-AAH0		M0	N0	T2	Stage IS	22	30		0	18	-2	0	YES	YES	23CCDBB6-C72D-458A-ADD1-3ED986393503	No Measureable Tumor or Tumor Markers	Fathered > or = 1 child by natural conception	NO	No	No		YES		Orchiectomy	Absent	100	Right		NO	YES	12	7	No	M0	NX	T2		AAH0	TUMOR FREE	3		305
TCGA-2G-AAFN-01A	26	430.36.0	Nationwide Children's Hospital	TCGA-2G-AAFN-F63212	C6163707-5C1F-4426-8797-C0C06D91AE6A	TCGA-2G-AAFN		M0	N1	T2	Stage IIIB	22	4		0	18	-3	0	YES	NO	386DA3B5-6458-43BC-B6E3-A9CBD09053DA	No Measureable Tumor or Tumor Markers	Fathered > or = 1 child by natural conception	NO	No	No	Good	YES		Orchiectomy	Absent	80	Right		NO	YES	12	8	No	M0	N1	T2		AAFN	TUMOR FREE	76	173.8	216
TCGA-XE-A8H4-01A	23	430.36.0	Nationwide Children's Hospital	TCGA-XE-A8H4-F67196	D2F64DD2-6E99-49C7-90C3-3A643B555A8F	TCGA-XE-A8H4		M0	NX	T1	Stage IA	22	31		0	11	-8	1	YES	NO	B848F9EE-E270-4FD0-B4B0-10229C812BF6	No Measureable Tumor or Tumor Markers	Did not attempt to reproduce	NO	No	No		YES		Orchiectomy	Absent	90	Left		NO	NO	12	10	No	M0	NX	TX		A8H4	TUMOR FREE	5		211
TCGA-S6-A8JX-01A	27	430.36.0	Nationwide Children's Hospital	TCGA-S6-A8JX-F66509	FF89B931-F4DC-4110-859B-514129770586	TCGA-S6-A8JX		M0	NX	T2	Stage IB	22	17		0	102		0		NO	793ABB5E-E173-4388-9505-03B610B32870	No Measureable Tumor or Tumor Markers		NO	No	No		YES		Orchiectomy	Absent	100	Right		NO	NO	12	10	No	M0	NX	T2		A8JX	TUMOR FREE	3		164
TCGA-2G-AAG9-01A	25	430.36.0	Nationwide Children's Hospital	TCGA-2G-AAG9-F62395	B83135C0-F8EB-4D6E-A12D-EA0291DAB26D	TCGA-2G-AAG9		M0	N1	T2	Stage IIIB	22	30		0	4	-4	0	YES	NO	56A03F53-C84F-4CB3-BD95-AE3986F11FE8	No Measureable Tumor or Tumor Markers	Did not attempt to reproduce	NO	No	Yes; left testicle only	Good	YES		Orchiectomy	Present	90	Left	Inguinal	NO	YES	12	7	No	M0	N1	T2		AAG9	TUMOR FREE	88	4.9	406
TCGA-2G-AAGI-01A	33	430.36.0	Nationwide Children's Hospital	TCGA-2G-AAGI-F63277	0241B0F2-03B3-46C3-8CF2-D9CB6064B2C0	TCGA-2G-AAGI		M0	N0	T1	Stage IS	22	5		0	15	-3	0	NO	NO	A3F1F923-EC23-465A-BF5B-E58BC79C0136	No Measureable Tumor or Tumor Markers	Fathered > or = 1 child by natural conception	NO	No	No		YES		Orchiectomy	Present	100	Right		NO	NO	12	8	No	M0	N0	T1		AAGI	TUMOR FREE	4	1.6	262
TCGA-2G-AAGI-05A	33	430.36.0	Nationwide Children's Hospital	TCGA-2G-AAGI-F63277	0241B0F2-03B3-46C3-8CF2-D9CB6064B2C0	TCGA-2G-AAGI		M0	N0	T1	Stage IS	22	5		0	15	-3	0	NO	NO	A3F1F923-EC23-465A-BF5B-E58BC79C0136	No Measureable Tumor or Tumor Markers	Fathered > or = 1 child by natural conception	NO	No	No		YES		Orchiectomy	Present	100	Right		NO	NO	12	8	No	M0	N0	T1		AAGI	TUMOR FREE	4	1.6	262
TCGA-ZM-AA0B-01A	32	430.36.0	Nationwide Children's Hospital	TCGA-ZM-AA0B-F64816	B0970AF8-91D5-4DCE-B39B-EABA17089CEA	TCGA-ZM-AA0B		M0	N0	T1	Stage IA	22	12		0	472	-1	0	NO	NO	39BCED4F-7426-4861-81CF-18D487290F28	No Measureable Tumor or Tumor Markers	Fathered > or = 1 child by natural conception	NO	No	No		YES		Orchiectomy	Absent	100	Left		NO	NO	12	9	No	M0	NX	T1		AA0B	TUMOR FREE	7	0	160
TCGA-2G-AAGZ-01A	27	430.36.0	Nationwide Children's Hospital	TCGA-2G-AAGZ-F63020	2CF48F50-B92C-4115-B9F1-E45341C8DBF1	TCGA-2G-AAGZ		M1a	N2	T2	Stage IIIA	22	30		0	-3	-3	0		NO	369AAD53-CFD4-4018-823B-ADDF712B58EC	Normalization of Tumor Markers, but Residual Tumor Mass	Did not attempt to reproduce	NO	No	No	Intermediate	YES		Orchiectomy	Present	90	Left		NO	YES	12	7	No	M1a	N2	T2		AAGZ	TUMOR FREE	7		2035
TCGA-WZ-A7V4-01A	28	430.36.0	Nationwide Children's Hospital	TCGA-WZ-A7V4-F72690	D04B6943-C787-469E-B7EB-1CEB9FC63B6E	TCGA-WZ-A7V4		M0	N0			22	31		0	154	-1	0	NO	NO	AD00BF6D-E594-4E8D-BDD4-3480C1BF3F18			NO	No	No		YES		Orchiectomy	Absent	100	Left		NO	NO	12	7	No		NX	T1		A7V4	TUMOR FREE	5.2	0.5
TCGA-4K-AA1I-01A	26	430.36.0	Nationwide Children's Hospital			TCGA-4K-AA1I		M0	N0	T1	Stage IA	22			0						EA7F3560-4342-435B-AF43-01C586C4DBF8				No			YES		Orchiectomy	Absent		Left			NO	12		No	M0	N0	T1		AA1I
TCGA-WZ-A8D5-01A	38	430.36.0	Nationwide Children's Hospital	TCGA-WZ-A8D5-F72692	EE1A4599-0765-4007-85F9-F96A42EBAD35	TCGA-WZ-A8D5		M0	N0	T2		22	31		0	116	-8	0	YES	NO	F624FFED-9AAE-4904-B39E-39FEB15DB825			NO	No			YES		Orchiectomy		100	Left		NO	YES	12	7	No	M0	NX	T3		A8D5	TUMOR FREE	1.9	1.2
TCGA-XE-AANI-01A	37	430.36.0	Nationwide Children's Hospital	TCGA-XE-AANI-F67413	100D92A2-1250-4FEC-99ED-D2A121031A95	TCGA-XE-AANI		M0	NX	T1	Stage IS	22	4		0	1034	-5	1	YES	NO	492201B1-3BFA-41CE-9D18-E601A491D033	No Measureable Tumor or Tumor Markers	Did not attempt to reproduce	NO	No	No		YES		Orchiectomy	Absent	90	Left		NO	NO	12	11	No	M0	NX	T1		AANI	TUMOR FREE	39		170
TCGA-ZM-AA0D-01A	34	430.36.0	Nationwide Children's Hospital	TCGA-ZM-AA0D-F69243	20236861-C8E7-4893-AAE0-6A8D395FB8F5	TCGA-ZM-AA0D		M0	N0	T1	Stage IA	22	31		0	519	-5	0	YES	NO	6C3FAF5F-EF2C-4C45-84CA-2C2C62CEE077	No Measureable Tumor or Tumor Markers	Fathered > or = 1 child by natural conception	NO	No	No		YES		Orchiectomy	Absent	100	Right		NO	NO	12	12	No	M0	NX	T1		AA0D	TUMOR FREE	3	0	166
TCGA-ZM-AA05-01A	36	430.36.0	Nationwide Children's Hospital	TCGA-ZM-AA05-F64815	E1078FDF-34FB-4E7F-82EC-C184DD2DFAE9	TCGA-ZM-AA05		M0	N3	T2	Stage IIC	22	12		0	20	-1	0	NO	NO	5A9C968A-8315-442B-A415-B859BABF5AED	Normalization of Tumor Markers, but Residual Tumor Mass	Did not attempt to reproduce	NO	No	No	Good	YES		Orchiectomy	Absent	100	Left		NO	YES	12	9	No	M0	NX	T2		AA05	TUMOR FREE	2.93	9.6	329	11.5
TCGA-VF-A8AC-01A	29	430.36.0	Nationwide Children's Hospital	TCGA-VF-A8AC-F64020	9940BD54-01F0-4312-B562-DDC013BC0D09	TCGA-VF-A8AC		M0	NX	T1	Stage IA	22	16		0	58	-7		YES	YES	997A13E4-846F-4F4F-8B11-12EDC2DF175F	No Measureable Tumor or Tumor Markers	Did not attempt to reproduce	NO	No	No		YES		Orchiectomy	Present		Right		NO	NO	12	9	No	M0	NX	T1		A8AC	TUMOR FREE
TCGA-YU-AA61-01A	29	430.36.0	Nationwide Children's Hospital	TCGA-YU-AA61-F66896	98372A98-EC10-468E-AA0A-0527F3788B2C	TCGA-YU-AA61		M0	N0		Stage IS	22	27		0	15	-4		NO	NO	3EF25997-ECBD-4127-A55D-9B8890BE394C	No Measureable Tumor or Tumor Markers		NO	No	No	Good	YES		Orchiectomy	Absent		Left		NO	NO	12	10	No			T1		AA61	TUMOR FREE	524.7	0.6	381
TCGA-2G-AAFL-01A	35	430.36.0	Nationwide Children's Hospital	TCGA-2G-AAFL-F63214	D79F15E2-682C-472B-AC65-E511198D7FB1	TCGA-2G-AAFL		M0	N0	T2	Stage IB	22	4		0	30	-3	0	NO	NO	1CD66B4F-4FD6-409E-A424-320B509C352B	No Measureable Tumor or Tumor Markers	Did not attempt to reproduce	NO	No	No		YES		Orchiectomy	Present	90	Left		NO	YES	12	8	No	M0	N0	T2		AAFL	TUMOR FREE	3	0.4	151
TCGA-YU-A912-01A	34	430.36.0	Nationwide Children's Hospital	TCGA-YU-A912-F68139	5C494214-92A9-4A70-B05E-777635510D16	TCGA-YU-A912		M0	N3		Stage IIIC	22	13		0		-5		YES	NO	F86D8EA4-E08E-435E-A69D-D5AD3A0DA72B	Normalization of Tumor Markers, but Residual Tumor Mass		NO	No	Yes; left testicle only	Good	YES	Laparotomy	Other method, specify:	Absent		Left	Non-palpable - high	NO	NO	12	11	No			T1		A912	WITH TUMOR
TCGA-4K-AA1G-01A	34	430.36.0	Nationwide Children's Hospital	TCGA-4K-AA1G-F68329	6BC9C93A-1A22-459F-BBBB-999AD547EF3C	TCGA-4K-AA1G		M0	N0	T2	Stage IS	22	14		0	29	-1	0			0ECC65D4-A7A2-4306-8100-8DF38EFE5CC3		Fathered > or = 1 child by natural conception	NO	No	No	Good	YES		Orchiectomy	Absent	100	Left		NO	YES	12	11	No	M0	N0	T2		AA1G	TUMOR FREE	7.2	9.29	450
TCGA-2G-AAFE-01A	37	430.36.0	Nationwide Children's Hospital	TCGA-2G-AAFE-F62254	0BEA3A8B-0EC9-4826-AE75-EA8840D64DAB	TCGA-2G-AAFE	Metachronous	M0	N1	T2	Stage IIA	22	17	-5179	0	73	-2	0	NO	NO	13253C0D-1104-4D35-83D3-32749D089FC2	No Measureable Tumor or Tumor Markers	Did not attempt to reproduce	NO	No	Yes; right testicle only		YES		Orchiectomy	Present	90	Bilateral	Inguinal	NO	YES	12	7	Yes	M0	N1	T2		AAFE	TUMOR FREE	5	0.1	274
TCGA-ZM-AA0F-01A	35	430.36.0	Nationwide Children's Hospital	TCGA-ZM-AA0F-F68856	4CE18DE5-13AB-411F-B52B-B1930ABB13AF	TCGA-ZM-AA0F		M0	N0	T1	Stage IA	22	31		0	309	-1	0	YES	NO	AEF71951-8300-4903-A5C6-CF1554830EC5	No Measureable Tumor or Tumor Markers		NO	No	No		YES		Orchiectomy	Absent	100	Right		NO	NO	12	12	No	M0	NX	T1		AA0F	TUMOR FREE	2	0	174
TCGA-2G-AAGG-01A	20	430.36.0	Nationwide Children's Hospital	TCGA-2G-AAGG-F63003	F6BA6595-07EE-4A8F-9531-83BC3FF60613	TCGA-2G-AAGG		M1b	N1	T3	Stage IIIC	22	30		0	11	-3	0	YES	NO	E94493FA-2619-4005-9EE2-83073B9CE746	Normalization of Tumor Markers, but Residual Tumor Mass	Did not attempt to reproduce	NO	No	No	Good	YES		Orchiectomy	Present	100	Left		NO		12	7	No	M1b	N1	T3		AAGG	TUMOR FREE	2	1.4	237
TCGA-2G-AAG5-01A	36	430.36.0	Nationwide Children's Hospital	TCGA-2G-AAG5-F63206	C32371E9-3567-45ED-9410-1DD0B216F7F7	TCGA-2G-AAG5		M0	N0	T1	Stage IS	22	4		0	23	-3	0	NO	NO	8E427561-BDA3-40B0-BC02-626FE4A4129A	No Measureable Tumor or Tumor Markers	Fathered > or = 1 child by natural conception	NO	No	No		YES		Orchiectomy	Present	100	Left		NO	NO	12	8	No	M0	N0	T1		AAG5	TUMOR FREE	2		246
TCGA-2G-AAHA-01A	48	430.36.0	Nationwide Children's Hospital	TCGA-2G-AAHA-F63082	06368D9C-D303-47E0-90F3-4A619BCF7C3B	TCGA-2G-AAHA		M0	N1	T2	Stage IIA	22	31		0	4	-6	0	YES	NO	CFA98631-188C-46F6-ABFD-03A62CE717F0	Normalization of Tumor Markers, but Residual Tumor Mass	Fathered > or = 1 child by natural conception	NO	No	Yes; left testicle only	Good	YES		Orchiectomy	Absent	90	Left	Inguinal	NO	NO	12	7	No	M0	NX	T2		AAHA	TUMOR FREE	3.7	0.04	315
TCGA-XE-AANJ-01A	39	430.36.0	Nationwide Children's Hospital	TCGA-XE-AANJ-F67408	42AC23DE-F6FA-46A4-8F12-09E6BFD6C44D	TCGA-XE-AANJ		M1a	N1	T2	Stage IIIB	22	4		0	18	-9	1	NO	NO	B6A815B2-4C34-4E91-8DA5-A7175740D440	Normalization of Tumor Markers, but Residual Tumor Mass	Fathered > or = 1 child by natural conception	NO	No	No	Intermediate	YES		Orchiectomy	Absent	90	Left		NO	YES	12	11	No	M0	NX	T2		AANJ	TUMOR FREE	1	20	662
TCGA-2G-AALP-01A	43	430.36.0	Nationwide Children's Hospital	TCGA-2G-AALP-F63274	61983B03-8FD5-473F-BB11-DF30A2887C97	TCGA-2G-AALP		M1	N1	T1	Stage IIIB	22	5		0	39	-9	1	NO	NO	299AACC1-86B4-4FA2-A5E2-29BA43ABE8E0	Normalization of Tumor Markers, but Residual Tumor Mass	Did not attempt to reproduce	NO	No	No		YES		Orchiectomy	Absent	80	Left		NO	NO	12	8	No	M1	NX	T1		AALP	TUMOR FREE	1		406
TCGA-2G-AAGT-01A	30	430.36.0	Nationwide Children's Hospital	TCGA-2G-AAGT-F63013	31AC3FFF-D9A4-4B97-8D52-7FF72BB7F1CE	TCGA-2G-AAGT		M0	N0	T2	Stage IS	22	30		0	9	-4	0	YES	NO	B72715F7-E1F8-4109-B104-CAD9CC002A4C	No Measureable Tumor or Tumor Markers	Did not attempt to reproduce	NO	No	No		YES		Orchiectomy	Absent	90	Left		NO	YES	12	7	No	M0	NX	T2		AAGT	TUMOR FREE	322	38.1	400
TCGA-XE-AAOB-01A	27	430.36.0	Nationwide Children's Hospital			TCGA-XE-AAOB		M0	N0	T1	Stage IS	22			0	442	-17		NO	NO	59E911D0-D558-4C9C-8C40-B67F3EDD9761	Progressive Tumor Mass and Tumor Markers	Did not attempt to reproduce	NO	No	No	Intermediate	YES		Orchiectomy	Present		Right			NO	12		No	M0	NX	T1		AAOB		0.6	38014	338
TCGA-2G-AAGP-01A	33	430.36.0	Nationwide Children's Hospital	TCGA-2G-AAGP-F63010	F7FF8AED-6D3A-4979-9803-25DDC33EA06D	TCGA-2G-AAGP		M0	N1	T2	Stage IIA	22	30		0	8	-3	0	NO	NO	8E8ED021-447A-4A50-8B37-74022F3EEB2E	No Measureable Tumor or Tumor Markers	Did not attempt to reproduce	NO	No	No	Good	YES		Orchiectomy	Present	100	Right		NO	YES	12	7	No	M0	N1	T2		AAGP	TUMOR FREE	5	7.9	357
TCGA-ZM-AA0E-01A	39	430.36.0	Nationwide Children's Hospital	TCGA-ZM-AA0E-F69242	776CDA31-791E-4FD7-B58F-C707BDB6B6AE	TCGA-ZM-AA0E	Synchronous	M0	N0	T1	Stage IA	22	31	0	0	490	-8	0	YES	NO	59012C41-2458-4958-9394-AD83516BFF94	No Measureable Tumor or Tumor Markers	Fathered > or = 1 child by natural conception	NO	No	No		YES		Orchiectomy	Present	100	Bilateral		NO	NO	12	12	No	M0	NX	T1		AA0E	TUMOR FREE	1.7	0	153
TCGA-2G-AAG8-01A	21	430.36.0	Nationwide Children's Hospital	TCGA-2G-AAG8-F62389	4F21709C-8CFA-4790-A4E5-F430D0768ED3	TCGA-2G-AAG8		M0	N1	T2	Stage IIA	22	30		0	28	-3	0	NO	NO	E7EA5A8E-0211-4715-859F-C21115E682DA	No Measureable Tumor or Tumor Markers	Did not attempt to reproduce	NO	No	No	Good	YES		Orchiectomy	Present	100	Right		NO	YES	12	7	No	M0	N0	T2		AAG8	TUMOR FREE	4	0.1	529
TCGA-SO-A8JP-01A	29	430.36.0	Nationwide Children's Hospital	TCGA-SO-A8JP-F69303	BDCFB390-63AC-4E40-8597-809A8C4CF32A	TCGA-SO-A8JP						22	31		0			0	YES	NO	70D5785E-B47E-4BA1-9A00-0913366662B6			NO	No	No		YES		Orchiectomy		100	Left		NO	NO	12	12	No	M0	N0	T1		A8JP	TUMOR FREE
TCGA-WZ-A7V5-01A	27	430.36.0	Nationwide Children's Hospital	TCGA-WZ-A7V5-F72694	C1030C77-2DED-4B3D-ABAF-B2A93B86C945	TCGA-WZ-A7V5		M0	N0			22	31		0		-7	0	YES	NO	44D581B3-A510-4213-9771-53DFBAAA3F86			NO	No	No		YES		Orchiectomy	Absent	100	Right		NO	YES	12	7	No		NX	T2		A7V5	TUMOR FREE
TCGA-XE-A8H1-01A	24	430.36.0	Nationwide Children's Hospital	TCGA-XE-A8H1-F67189	0941CDEC-AEA5-4353-8B96-6096A9664C9F	TCGA-XE-A8H1		M0	NX	T2	Stage IS	22	31		0	17	-3	1	NO	NO	88CFE47D-E34C-4EC8-A3DC-BEAE6509F72D	No Measureable Tumor or Tumor Markers	Did not attempt to reproduce	NO	No	No	Intermediate	YES		Orchiectomy	Present	90	Right		NO	YES	12	10	No	M0	NX	T2		A8H1	TUMOR FREE	33.8	351	1303
TCGA-SN-A84X-01A	21	430.36.0	Nationwide Children's Hospital	TCGA-SN-A84X-F62995	5EF75230-5789-4525-ADAA-BC2B24C1E0AC	TCGA-SN-A84X		M0			Stage IB	22	29		0						67FD5EE8-A835-4D20-B9FA-794976F95FB5	No Measureable Tumor or Tumor Markers	Did not attempt to reproduce		No	No		YES		Orchiectomy			Right		NO	YES	12	7	No	M0	NX	T2		A84X	TUMOR FREE
TCGA-2G-AAHN-01A	32	430.36.0	Nationwide Children's Hospital	TCGA-2G-AAHN-F63094	140EBF9B-A15F-4687-A91A-0D11D05E1C08	TCGA-2G-AAHN		M0	N0	T1	Stage I	22	31		0	16	-4	0	YES	NO	397AA5C3-513B-4246-806B-0DFE4171906C	No Measureable Tumor or Tumor Markers	Did not attempt to reproduce	NO	No	Yes; left testicle only		YES		Orchiectomy	Absent	100	Left	Inguinal	NO	NO	12	7	No	M0	N0	T1		AAHN	TUMOR FREE	2		167
TCGA-ZM-AA06-01A	45	430.36.0	Nationwide Children's Hospital	TCGA-ZM-AA06-F72070	CB8FC0DB-EAF0-4283-9C9B-D341280F57FD	TCGA-ZM-AA06		M0	N0	T2	Stage IB	22	9		0	46	-7	0	YES	NO	8D117BFE-53A0-4A90-BD3C-882727E0796B	No Measureable Tumor or Tumor Markers	Fathered > or = 1 child by natural conception	NO	No	No	Good	YES		Orchiectomy	Absent	100	Right		NO	YES	12	4	No	M0	NX	T2		AA06	TUMOR FREE	4.4	0	162
TCGA-2X-A9D6-01A	42	430.36.0	Nationwide Children's Hospital	TCGA-2X-A9D6-F71236	2A786B1A-18F7-42A9-870D-33EFA71B60AA	TCGA-2X-A9D6						22	23		0			1	NO	NO	257ADE0C-D956-48E2-A123-830C56C4F3EE			NO	No	No		YES		Orchiectomy	Present	80	Left		NO	NO	12	3	No	M0	NX	T1		A9D6	WITH TUMOR
TCGA-VF-A8AE-01A	39	430.36.0	Nationwide Children's Hospital	TCGA-VF-A8AE-F64021	9C1012F3-A9C3-4536-9E1C-89120C061D8F	TCGA-VF-A8AE		M0	NX	T1	Stage IA	22	16		0		0		YES	NO	FE1E8E07-FE41-4616-8B2E-A0F184164640	No Measureable Tumor or Tumor Markers	Fathered > or = 1 child by unspecified method	NO	No	No		YES		Orchiectomy	Present		Right		NO	NO	12	9	No	M0	NX	T1		A8AE	TUMOR FREE
TCGA-2G-AAKM-01A	14	430.36.0	Nationwide Children's Hospital	TCGA-2G-AAKM-F63266	FC4CD025-E236-4A6C-B936-7FA6AF32EB41	TCGA-2G-AAKM		M0	N1	T2	Stage IIA	22	5		0	4	-6	1	NO	NO	19602EA4-9C44-47C7-A727-8F63845FB8E7	No Measureable Tumor or Tumor Markers	Did not attempt to reproduce	NO	No	No	Good	YES		Orchiectomy	Present	90	Right		NO	YES	12	8	No	M0	NX	T2	Non-Cancer Related	AAKM	TUMOR FREE	3	54.9	185
TCGA-2G-AAKG-01A	22	430.36.0	Nationwide Children's Hospital	TCGA-2G-AAKG-F63261	D5A2C36A-435C-4D82-85CC-74B9393674C9	TCGA-2G-AAKG		M0	N0	T1	Stage I	22	5		0	31	-10	0			80E06B6C-C8FC-47A4-8E07-A6DFB2F1A25F	No Measureable Tumor or Tumor Markers	Did not attempt to reproduce	NO	No	No		YES		Orchiectomy	Absent	100	Left		NO	NO	12	8	No	M0	N0	T1		AAKG	TUMOR FREE	5		231
TCGA-2G-AAKG-05A	22	430.36.0	Nationwide Children's Hospital	TCGA-2G-AAKG-F63261	D5A2C36A-435C-4D82-85CC-74B9393674C9	TCGA-2G-AAKG		M0	N0	T1	Stage I	22	5		0	31	-10	0			80E06B6C-C8FC-47A4-8E07-A6DFB2F1A25F	No Measureable Tumor or Tumor Markers	Did not attempt to reproduce	NO	No	No		YES		Orchiectomy	Absent	100	Left		NO	NO	12	8	No	M0	N0	T1		AAKG	TUMOR FREE	5		231
TCGA-X3-A8G4-01A	33	430.36.0	Nationwide Children's Hospital			TCGA-X3-A8G4						22			0	93			YES	NO	0F465D5C-97EC-4D94-8571-7BE1F880B420	No Measureable Tumor or Tumor Markers	Fathered > or = 1 child by natural conception		No	No		YES		Orchiectomy	Present		Left			NO	12		No	M0	N0	T1		A8G4		3	0.1	263
TCGA-XY-A8S2-01A	67	430.36.0	Nationwide Children's Hospital	TCGA-XY-A8S2-F66564	FF485FCD-752F-4562-ADC6-1E69FA8080EA	TCGA-XY-A8S2		M0	NX	T2	Stage I	22	21		0	2	-8		NO	NO	D3FF2EBD-2265-4CEF-ABCD-BB554AECA93F		Fathered > or = 1 child by natural conception	NO	No	No		YES		Orchiectomy	Present		Left		NO	YES	12	10	No	M0	NX	T2		A8S2	TUMOR FREE	4.6	58	415
TCGA-2G-AAG7-01A	33	430.36.0	Nationwide Children's Hospital	TCGA-2G-AAG7-F62387	817C4EB7-4471-461B-B3D0-8FE08BABD0F7	TCGA-2G-AAG7		M0	N0	T1	Stage IS	22	30		0	24	-3	0	NO	NO	67321D96-265F-423A-8474-A11A1AF44A44	No Measureable Tumor or Tumor Markers	Fathered > or = 1 child by natural conception	NO	No	No		YES		Orchiectomy	Present	100	Left		NO	NO	12	7	No	M0	N0	T1		AAG7	TUMOR FREE	2	0.13	127
TCGA-W4-A7U3-01A	26	430.36.0	Nationwide Children's Hospital	TCGA-W4-A7U3-F61816	EC6BF4C4-D8FD-49D3-B487-4947430E4198	TCGA-W4-A7U3		M0	N0	T1	Stage IS	22	7		0	149	-5		YES	NO	09C42FED-4D84-432D-9C6E-2ACFA01F1473	No Measureable Tumor or Tumor Markers		NO	No	No		YES		Orchiectomy	Present		Left		YES	NO	12	7	No		NX	T1		A7U3		1.19		466
TCGA-2G-AAKD-01A	18	430.36.0	Nationwide Children's Hospital	TCGA-2G-AAKD-F63223	72B8F4EB-BC0C-450F-8E14-9170044B231E	TCGA-2G-AAKD		M1a	N2	T2	Stage III	22	4		0	-4	-9	1	NO	NO	84802D8B-BF4B-49DF-8410-FC98F9E88F38	No Measureable Tumor or Tumor Markers	Did not attempt to reproduce	NO	No	No	Intermediate	YES		Orchiectomy	Present	80	Right		NO	YES	12	8	No	M0	NX	T2		AAKD	TUMOR FREE	155	510.6	417
TCGA-2G-AAFJ-01A	23	430.36.0	Nationwide Children's Hospital	TCGA-2G-AAFJ-F63215	ECCD7037-5057-4746-8298-A8593BAAA8BA	TCGA-2G-AAFJ		M0	N0	T1	Stage I	22	4		0	23	-3	0	NO	YES	61B0B430-B9DA-4413-8D60-5D26DD9D5239	No Measureable Tumor or Tumor Markers	Fathered > or = 1 child by natural conception	NO	No	No		YES		Orchiectomy	Absent	90	Right		NO	NO	12	8	No	M0	N0	T1		AAFJ	TUMOR FREE	9		109
TCGA-2G-AAGY-01A	28	430.36.0	Nationwide Children's Hospital	TCGA-2G-AAGY-F63018	E746C66F-F5CD-4CCA-84E6-0802011E38CC	TCGA-2G-AAGY		M0	N0	T1	Stage IS	22	30		0	28	-3	0	NO	NO	0A38D395-CAD4-4F18-A353-987FE9F136DA	No Measureable Tumor or Tumor Markers	Did not attempt to reproduce	NO	No	No		YES		Orchiectomy	Absent	100	Left		NO	NO	12	7	No	M0	N0	T1		AAGY	TUMOR FREE	3	0.4	393
TCGA-2G-AAGY-05A	28	430.36.0	Nationwide Children's Hospital	TCGA-2G-AAGY-F63018	E746C66F-F5CD-4CCA-84E6-0802011E38CC	TCGA-2G-AAGY		M0	N0	T1	Stage IS	22	30		0	28	-3	0	NO	NO	0A38D395-CAD4-4F18-A353-987FE9F136DA	No Measureable Tumor or Tumor Markers	Did not attempt to reproduce	NO	No	No		YES		Orchiectomy	Absent	100	Left		NO	NO	12	7	No	M0	N0	T1		AAGY	TUMOR FREE	3	0.4	393
TCGA-S6-A8JY-01A	27	430.36.0	Nationwide Children's Hospital	TCGA-S6-A8JY-F64017	EFC740D2-CB15-4303-9DE4-5156682922E1	TCGA-S6-A8JY		M0	NX	T1	Stage IS	22	25		0	208	0				C1FB418E-434C-461E-8704-B4210EA6F062		Fathered > or = 1 child by natural conception	NO	No	No	Good	YES		Orchiectomy	Present		Left		YES	NO	12	8	No	M0	NX	T1		A8JY	TUMOR FREE	1.6		150
TCGA-2G-AAGF-01A	28	430.36.0	Nationwide Children's Hospital	TCGA-2G-AAGF-F63002	35AC4995-E12A-4479-B380-4938F4CAA248	TCGA-2G-AAGF		M0	N0	T2	Stage IS	22	30		0	23	-4	0	NO	NO	31F5B98F-291F-428E-9A07-690479871D49	No Measureable Tumor or Tumor Markers	Fathered > or = 1 child by natural conception	NO	No	Yes; left testicle only		YES		Orchiectomy	Present	100	Left	Non-palpable - high	NO	YES	12	7	No	M0	N0	T2		AAGF	TUMOR FREE	2		183
TCGA-2G-AAFI-01A	41	430.36.0	Nationwide Children's Hospital	TCGA-2G-AAFI-F63216	061B60F5-1B91-498B-A641-5A8444FBBF67	TCGA-2G-AAFI		M0	N0	T2	Stage IB	22	4		0	14	-2	0	NO	YES	D476220E-1AC3-4769-9BB4-0E13F51CAE2B	No Measureable Tumor or Tumor Markers	Did not attempt to reproduce	NO	No	No		YES		Orchiectomy	Present	90	Left		NO	YES	12	8	No	M0	N0	T2		AAFI	TUMOR FREE	1.3	0.7	150
TCGA-2G-AAHL-01A	26	430.36.0	Nationwide Children's Hospital	TCGA-2G-AAHL-F63093	F2DA56E5-9537-494F-A9A9-46495A638F07	TCGA-2G-AAHL		M0	N0	T2	Stage I	22	31		0	10	-4	0	NO	NO	BD2144B6-8101-40B6-82FC-4E43AB415561	No Measureable Tumor or Tumor Markers	Did not attempt to reproduce	NO	No	Yes; left testicle only		YES		Orchiectomy	Present	100	Left	Inguinal	NO	YES	12	7	No	M0	N0	T2		AAHL	TUMOR FREE	2		181
TCGA-2G-AAGS-01A	39	430.36.0	Nationwide Children's Hospital	TCGA-2G-AAGS-F63012	31D3C420-A1E7-4942-A5D1-CEB07608659C	TCGA-2G-AAGS		M0	N1	T1	Stage IIIB	22	30		0	17	-7	0	NO	NO	E310C763-C55C-4394-98E6-94E19A3B77EB	No Measureable Tumor or Tumor Markers		NO	No	No	Good	YES		Orchiectomy	Absent	100	Right		NO	NO	12	7	No	M0	N1	T1		AAGS	TUMOR FREE	88	2	349
TCGA-2X-A9D5-01A	49	430.36.0	Nationwide Children's Hospital	TCGA-2X-A9D5-F71237	FC0F2B62-D083-44C4-A0A2-31E7817B1AF1	TCGA-2X-A9D5					Stage II	22	23		0	41	-8	0	YES	NO	BF8714F6-9261-46E3-973D-090B991740F5	No Measureable Tumor or Tumor Markers		NO	No	No		YES		Orchiectomy		100	Left		NO	NO	12	3	No	M0	NX	T1		A9D5	TUMOR FREE	6
TCGA-2G-AAF1-01A	28	430.36.0	Nationwide Children's Hospital	TCGA-2G-AAF1-F62234	7C27FE21-AEC4-4BE7-8734-EB1144929E18	TCGA-2G-AAF1		M0	N0	T1	Stage IS	22	16		0	12	-2	0	YES	NO	0A2EF58A-1DC3-4AF8-9908-CE95B408E33D	No Measureable Tumor or Tumor Markers	Did not attempt to reproduce	YES	No	Yes; right testicle only	Good	YES		Orchiectomy	Absent	90	Right	Inguinal	NO	YES	12	7	No	M0	N0	T1		AAF1	TUMOR FREE	3		164
TCGA-2G-AAL5-01A	31	430.36.0	Nationwide Children's Hospital	TCGA-2G-AAL5-F63268	1C127D82-F830-494E-9F9B-B8884039A545	TCGA-2G-AAL5		M0	N0	T1	Stage I	22	5		0	39	-9	0		NO	E7B33B2A-6220-42C4-84E6-BD029FFFD48E	No Measureable Tumor or Tumor Markers	Fathered > or = 1 child by natural conception	NO	No	No		YES		Orchiectomy	Absent	100	Right		NO	NO	12	8	No	M0	N0	T1		AAL5	TUMOR FREE	4		327
TCGA-S6-A8JW-01A	37	430.36.0	Nationwide Children's Hospital	TCGA-S6-A8JW-F66512	D264009E-5C0D-4150-BB21-DF463337DECA	TCGA-S6-A8JW		M0	NX	T1	Stage IS	22	17		0	340		0			42A4C2C4-078E-4DB8-BBD4-5D7A28C4E273	No Measureable Tumor or Tumor Markers	Did not attempt to reproduce	NO	No			YES		Orchiectomy	Present	90	Left		NO	NO	12	10	No	M0	NX	T1		A8JW	TUMOR FREE	1.8		145
TCGA-XE-AAOD-01A	39	430.36.0	Nationwide Children's Hospital	TCGA-XE-AAOD-F67607	280F82CC-3025-48E1-B928-39AA25294960	TCGA-XE-AAOD		M0	N0	T2	Stage IB	22	6		0	21	-3	1	YES	NO	1933E8CF-16FF-4F27-9667-674271F2FB27	No Measureable Tumor or Tumor Markers	Did not attempt to reproduce	NO	No	No	Good	YES		Orchiectomy	Present	90	Right		NO	YES	12	11	No	M0	NX	T2		AAOD	TUMOR FREE	2.1	1.5	138
TCGA-2G-AAFM-01A	31	430.36.0	Nationwide Children's Hospital	TCGA-2G-AAFM-F63213	88BF42E5-84FF-4456-9C49-BB1E0BBE40AA	TCGA-2G-AAFM		M0	N1	T2	Stage IIA	22	4		0	16	-3	1		NO	A7D3C2F5-6B94-4CCA-B41C-2BB7CB8D34A0	No Measureable Tumor or Tumor Markers	Did not achieve pregnancy following > or = 12 months of unprotected intercourse	NO	No	No	Good	YES		Orchiectomy	Absent	90	Right		NO	YES	12	8	No	M0	N1	T2		AAFM	TUMOR FREE	3	14.4	278
TCGA-2G-AAGE-01A	21	430.36.0	Nationwide Children's Hospital	TCGA-2G-AAGE-F63001	7B0ED30C-F363-4F63-80B2-EF0996482DA6	TCGA-2G-AAGE		M0	N0	T1	Stage IS	22	30		0	13	-4	0	NO	YES	3042F49C-9E7B-418D-8F86-6C39127F2F15	No Measureable Tumor or Tumor Markers	Did not attempt to reproduce	NO	No	No		YES		Orchiectomy	Absent	100	Left		NO	NO	12	7	No	M0	N0	T1		AAGE	TUMOR FREE	3	1.5	273
TCGA-2G-AAH2-01A	20	430.36.0	Nationwide Children's Hospital	TCGA-2G-AAH2-F63023	BF3A03B1-1101-4A30-BF61-35131A26B0D7	TCGA-2G-AAH2		M0	N0	T1	Stage IS	22	30		0	19	-4	0		NO	DD81E1E6-4ABF-4604-9BCF-DBF4D95D1C0E	No Measureable Tumor or Tumor Markers	Did not attempt to reproduce	NO	No	No		YES		Orchiectomy	Absent	100	Left		NO	NO	12	7	No	M0	N0	T1		AAH2	TUMOR FREE	2		277
TCGA-2G-AAGC-01A	28	430.36.0	Nationwide Children's Hospital	TCGA-2G-AAGC-F63000	A8246386-CDF8-4E46-A70E-3BA46ED03D4D	TCGA-2G-AAGC		M0	N0	T1	Stage IS	22	30		0	22	-4	0		NO	6481AAA8-08D0-4380-BAEA-1248E045A49E	No Measureable Tumor or Tumor Markers	Did not attempt to reproduce	NO	No	No		YES		Orchiectomy	Present	100	Left		NO	YES	12	7	No	M0	N0	T1		AAGC	TUMOR FREE	3		354
TCGA-2G-AAGO-01A	41	430.36.0	Nationwide Children's Hospital	TCGA-2G-AAGO-F63009	7198D40D-D7D7-4ADB-80E6-997E4131B087	TCGA-2G-AAGO		M0	N0	T2	Stage IS	22	30		0	14	-3	0		NO	661AE9E3-8959-4CAF-9064-7088A8A6C383		Fathered > or = 1 child by natural conception	NO	No	No		YES		Orchiectomy	Present	90	Left		NO	YES	12	7	No	M0	N0	T2		AAGO	TUMOR FREE	2	2.3	280
TCGA-2G-AAFZ-01A	32	430.36.0	Nationwide Children's Hospital	TCGA-2G-AAFZ-F62973	D5B52659-4104-4A75-A255-C21688517158	TCGA-2G-AAFZ		M1b	N1	T3	Stage IIIB	22	29		0	11	-4	0	NO	NO	BA55268C-2444-4728-A18B-B0E7EB4B78D4	Normalization of Tumor Markers, but Residual Tumor Mass	Did not attempt to reproduce	NO	No	No	Good	YES		Orchiectomy	Absent	90	Right		NO	YES	12	7	No	M1	NX	T3		AAFZ	TUMOR FREE	204	153.6	231
TCGA-VF-A8A8-01A	18	430.36.0	Nationwide Children's Hospital	TCGA-VF-A8A8-F63043	7DD3CE7E-324A-452D-A5C9-940F5B25EA70	TCGA-VF-A8A8		M0	N0	T1	Stage IA	22	16		0	10	-2		YES	YES	EF7793A3-BFF4-4845-8A0F-0AB3AC1F1423	No Measureable Tumor or Tumor Markers	Did not attempt to reproduce	NO	No	Yes; right testicle only		YES		Orchiectomy	Present		Right		NO	NO	12	9	No	M0	N0	T1		A8A8	TUMOR FREE	51		127
TCGA-YU-AA4L-01A	27	430.36.0	Nationwide Children's Hospital	TCGA-YU-AA4L-F67063	3E58C31C-2F23-450B-9A79-851FD8B21D98	TCGA-YU-AA4L		M0	N3		Stage IIIC	22	30		0		-7		YES	NO	23FAAC49-4DC4-408A-99F3-4C8497753725	Normalization of Tumor Markers, but Residual Tumor Mass		NO	No	No	Poor	YES		Orchiectomy	Absent		Right		NO	NO	12	10	No			T1		AA4L	TUMOR FREE
TCGA-2G-AAGK-01A	20	430.36.0	Nationwide Children's Hospital	TCGA-2G-AAGK-F63005	5CF3B62B-DB46-4CBB-9F37-5E87CF282FF7	TCGA-2G-AAGK		M0	N0	T2	Stage IS	22	30		0	38	-3	0	NO	YES	EBC3160F-6919-49A1-9FED-05EBA151B410	No Measureable Tumor or Tumor Markers	Did not attempt to reproduce	NO	No	No		YES		Orchiectomy	Absent	100	Left		NO	YES	12	7	No	M0	N0	T2		AAGK	TUMOR FREE		5	234
TCGA-2G-AAKL-01A	26	430.36.0	Nationwide Children's Hospital	TCGA-2G-AAKL-F63265	CF6C1F9B-7734-48DF-B482-DC12C1E9F37A	TCGA-2G-AAKL		M0	N1	T2	Stage II	22	5		0	6	-7	1	NO	NO	074D47B7-D50A-4E34-9768-95E309096B0B	No Measureable Tumor or Tumor Markers	Did not attempt to reproduce	NO	No	No	Good	YES		Orchiectomy	Present	90	Left		NO	YES	12	8	No	M0	NX	T2		AAKL	TUMOR FREE	415	1469	316
TCGA-4K-AA1H-01A	26	430.36.0	Nationwide Children's Hospital	TCGA-4K-AA1H-F70143	BE746689-CD2D-49E8-BC2E-FA3D17C79536	TCGA-4K-AA1H		M0	N0	T1	Stage IA	22	28		0		-2	0	NO	NO	77996835-8D10-457B-AFFF-66384A0F73EE	No Measureable Tumor or Tumor Markers	Did not attempt to reproduce	NO	No	No		YES		Orchiectomy	Present		Left		NO	YES	12	1	No	M0	N0	T2		AA1H	TUMOR FREE
TCGA-2G-AAGM-01A	51	430.36.0	Nationwide Children's Hospital	TCGA-2G-AAGM-F63007	7F28D4B7-703A-49A4-83A9-3825845FCD1F	TCGA-2G-AAGM		M0	N0	T2	Stage IS	22	30		0	11	-3	0	NO	NO	D6E5D270-2578-4C06-9EF7-CC09C9D478F9		Did not attempt to reproduce	NO	No	No		YES		Orchiectomy	Present	90	Right		NO	YES	12	7	No	M0	N0	T2		AAGM	TUMOR FREE	15.5	25	255
TCGA-SN-A6IS-01A	26	430.36.0	Nationwide Children's Hospital	TCGA-SN-A6IS-F62980	EEE1536C-2B51-40E4-997C-7C73BC28D1AF	TCGA-SN-A6IS		M0	NX	T1	Stage IS	22	29		0	55	-7		NO	NO	3CF3CD23-B50E-4C99-9BCE-3C8B450FD5AE	No Measureable Tumor or Tumor Markers	Fathered > or = 1 child by natural conception		No			YES		Orchiectomy			Right		NO		12	7	No	M0	NX	T1		A6IS	TUMOR FREE	3	1	165
TCGA-VF-A8AB-01A	31	430.36.0	Nationwide Children's Hospital	TCGA-VF-A8AB-F64019	DCB384C2-0A43-4813-82E6-C2C3720DE6E6	TCGA-VF-A8AB		M0	N0	T1	Stage IA	22	16		0		-3		YES	NO	330B69EA-96DE-41D4-8067-70B7EB7A2158		Did not attempt to reproduce	NO	No	No		YES		Orchiectomy	Absent		Right		YES	NO	12	9	No	M0	N0	T1		A8AB
TCGA-2G-AAGA-01A	38	430.36.0	Nationwide Children's Hospital	TCGA-2G-AAGA-F62397	05E85D0C-478F-421C-8D9E-C2211D591720	TCGA-2G-AAGA		M0	N1	T2	Stage IIA	22	30		0	124	-3	0	YES	NO	04EA7AE4-1EAF-4274-8297-2857912858A2	No Measureable Tumor or Tumor Markers	Fathered > or = 1 child by natural conception	NO	No	No	Good	YES		Orchiectomy	Absent	100	Right		NO	YES	12	7	No	M0	N1	T1		AAGA	TUMOR FREE	3		374
TCGA-2G-AAGJ-01A	28	430.36.0	Nationwide Children's Hospital	TCGA-2G-AAGJ-F63004	D7837A7A-4B68-40FF-882E-BB9FDC556C6B	TCGA-2G-AAGJ		M0	N0	T1	Stage IA	22	30		0	27	-4	0	NO	NO	9541306B-2700-4E37-A3D7-2603FB5FDA69	No Measureable Tumor or Tumor Markers	Fathered > or = 1 child by natural conception	NO	No	No		YES		Orchiectomy	Absent	100	Left		NO	NO	12	7	No	M0	N0	T1		AAGJ	TUMOR FREE	4	0.3	406
TCGA-2G-AAHG-01A	25	430.36.0	Nationwide Children's Hospital	TCGA-2G-AAHG-F63088	07D6286D-352B-4CE2-A43F-0DD255015584	TCGA-2G-AAHG		M0	N0	T1	Stage I	22	31		0	3	-4	0		NO	04783BA8-47FD-4543-B63A-244512901A20	No Measureable Tumor or Tumor Markers	Did not achieve pregnancy following > or = 12 months of unprotected intercourse	NO	No	Yes; left testicle only		YES		Orchiectomy	Present	100	Left	Inguinal	NO	NO	12	7	No	M0	N0	T1		AAHG	TUMOR FREE	3	1.7	199
TCGA-ZM-AA0N-01A	44	430.36.0	Nationwide Children's Hospital	TCGA-ZM-AA0N-F72071	AC4E2ADD-066D-49ED-808B-271FEAF04654	TCGA-ZM-AA0N		M0	N0	T2	Stage IB	22	11		0	323	0	0	YES	NO	FB7DD182-75FD-4C75-A55D-ABBCDC5DD769	No Measureable Tumor or Tumor Markers	Did not achieve pregnancy following > or = 12 months of unprotected intercourse	NO	No	No		YES		Orchiectomy	Present	100	Right		NO	YES	12	4	No	M0	NX	T2		AA0N		1.13		221
TCGA-YU-A90P-01A	25	430.36.0	Nationwide Children's Hospital	TCGA-YU-A90P-F67070	52FF616E-FF05-46BD-8459-AA91140D756D	TCGA-YU-A90P		M0	N0		Stage IA	22	30		0	12	-41		YES	NO	A53B4860-341A-4D36-BD3C-37E469F234E2	No Measureable Tumor or Tumor Markers		NO	No	No		YES		Orchiectomy	Absent		Left		NO	NO	12	10	No			T1		A90P	TUMOR FREE	0.69		257
TCGA-XE-A9SE-01A	35	430.36.0	Nationwide Children's Hospital	TCGA-XE-A9SE-F67309	E44F8512-A072-4695-B08A-C0B5B49FE077	TCGA-XE-A9SE		M0	NX	T1	Stage IA	22	3		0	35	-3	1	NO	NO	FE6B4EC6-70B6-425F-9A36-4019EBE6A829	No Measureable Tumor or Tumor Markers	Fathered > or = 1 child by natural conception	NO	No	No		YES		Orchiectomy	Absent	90	Right		NO	NO	12	11	No	M0	NX	T1		A9SE	TUMOR FREE	2		136
TCGA-2G-AAFO-01A	33	430.36.0	Nationwide Children's Hospital	TCGA-2G-AAFO-F63211	7E27A2E7-40B6-47C3-8AC3-817597564A7E	TCGA-2G-AAFO		M0	N1	T1	Stage IIA	22	4		0	20	-3	0	YES	NO	C8F1EA78-7A54-4AFD-A14E-BB8434B41D4E	No Measureable Tumor or Tumor Markers	Fathered > or = 1 child by natural conception	NO	No	No	Good	YES		Orchiectomy	Present	100	Left		NO	NO	12	8	No	M0	N1	T1		AAFO	TUMOR FREE	3	0.3	245
TCGA-2G-AAHT-01A	32	430.36.0	Nationwide Children's Hospital	TCGA-2G-AAHT-F63205	79059501-92B8-4F30-BB43-3AA039504FFD	TCGA-2G-AAHT		M0	N0	T2	Stage IS	22	4		0	42	-3	0	YES	NO	3C6C66BA-3C63-4E29-B200-8BAD262E0C5E	No Measureable Tumor or Tumor Markers	Did not attempt to reproduce	NO	No	Yes; left testicle only		YES		Orchiectomy		100	Left	Inguinal	NO	YES	12	8	No	M0	N0	T2		AAHT	TUMOR FREE	5		162
TCGA-SB-A6J6-01A	22	430.36.0	Nationwide Children's Hospital	TCGA-SB-A6J6-F60238	CBFED9C6-C362-41D3-AAF9-A34B0A09D918	TCGA-SB-A6J6						22	3		0	98	-13	0	NO	NO	F3E7EF06-614A-4732-A003-B871DFD5449A	No Measureable Tumor or Tumor Markers	Did not attempt to reproduce	NO	No	No		YES		Orchiectomy		100	Right		NO		12	6	No	M0	NX	T1		A6J6	TUMOR FREE	0.8		101
TCGA-2G-AAFV-01A	31	430.36.0	Nationwide Children's Hospital	TCGA-2G-AAFV-F62375	E9383673-D83F-41EE-B65F-1610BD7D2582	TCGA-2G-AAFV		M0	N0	T1	Stage IS	22	29		0	3	-3	0	NO	NO	F58C5EE6-C6D9-429C-9670-65FAB13232CE	No Measureable Tumor or Tumor Markers	Fathered > or = 1 child by assisted reproduction	NO	No	Yes; right testicle only		YES		Orchiectomy	Absent	100	Left	Inguinal	NO	NO	12	7	No	M0	N0	T1		AAFV	TUMOR FREE	3		182
TCGA-XY-A8S3-01B	24	430.36.0	Nationwide Children's Hospital	TCGA-XY-A8S3-F66484	1A785B0A-5D69-4DCA-8147-5876819E1FA2	TCGA-XY-A8S3		M0	NX	T2	Stage IS	22	21		0	9	0		YES	NO	8B325B07-959B-40A6-A6DF-6B32B5710C26			NO	No	No		YES		Orchiectomy	Present		Left		NO	YES	12	10	No	M0	NX	T2		A8S3	TUMOR FREE	27.1
TCGA-VF-A8A9-01A	31	430.36.0	Nationwide Children's Hospital	TCGA-VF-A8A9-F64018	8B0C68F8-E8ED-4A42-9591-EF4D97106D68	TCGA-VF-A8A9		M0	N0	T1	Stage IA	22	16		0	111	-4		YES	NO	EE0FA561-B086-4FAF-B91A-0B9F392270FF	No Measureable Tumor or Tumor Markers	Did not attempt to reproduce		No			YES		Orchiectomy	Present		Right		NO	NO	12	9	No	M0	N0	T1		A8A9	TUMOR FREE	3
TCGA-SB-A76C-01A	38	430.36.0	Nationwide Children's Hospital	TCGA-SB-A76C-F63117	D5484470-4BC6-47EF-A414-374DF6D05B12	TCGA-SB-A76C					Stage I	22	31		0	26	-11	0	NO	YES	CCAB0762-8F49-4B49-ADF1-B231F589F868	No Measureable Tumor or Tumor Markers	Fathered > or = 1 child by natural conception	NO	No	No		YES		Orchiectomy	Present	100	Left		NO	NO	12	7	No	M0	NX	T1		A76C	TUMOR FREE	4.3		138
TCGA-YU-A90Q-01A	21	430.36.0	Nationwide Children's Hospital	TCGA-YU-A90Q-F67033	87FF9934-F563-4EA6-AF3D-2C512541654D	TCGA-YU-A90Q		M0	N0		Stage IB	22	29		0	10	-33				09CF9FF0-CA29-4A6A-B259-69130EC3E895	No Measureable Tumor or Tumor Markers	Did not attempt to reproduce	NO	No	Yes; right testicle only	Good	YES		Orchiectomy	Present		Right	Inguinal	NO		12	10	No			T2		A90Q	TUMOR FREE	2.6	0.1	525
TCGA-XE-AAOL-01A	38	430.36.0	Nationwide Children's Hospital	TCGA-XE-AAOL-F67605	5E27137A-F8E7-4457-B062-F84E0EDD223E	TCGA-XE-AAOL		M0	NX	T1	Stage I	22	6		0		-5	1	NO	NO	3DDC0802-2DA5-44C2-8294-31F6252B9657		Did not attempt to reproduce	NO	No	No		YES		Orchiectomy	Absent	90	Left		YES	NO	12	11	No	M0	NX	T1		AAOL	TUMOR FREE
TCGA-VF-A8AA-01A	51	430.36.0	Nationwide Children's Hospital	TCGA-VF-A8AA-F64022	D169C17E-3E46-4D28-9831-4E194F29AB38	TCGA-VF-A8AA		M0	N0	T1	Stage I	22	16		0	87	0		YES	YES	3C4A4A9E-D89D-4C94-94EB-73B4C03CD354	No Measureable Tumor or Tumor Markers	Fathered > or = 1 child by unspecified method	NO	No	Yes; right testicle only		YES		Orchiectomy	Absent		Right		NO	NO	12	9	No	M0	N0	T1		A8AA	TUMOR FREE	1
TCGA-W4-A7U4-01A	23	430.36.0	Nationwide Children's Hospital	TCGA-W4-A7U4-F61817	4B9CDD96-E59F-48D1-874F-A7DCD7370CB3	TCGA-W4-A7U4		M0	N0	T1	Stage I	22	7		0	528	-16		NO	NO	369F9F10-003B-4072-93CB-5F52F59A983E	No Measureable Tumor or Tumor Markers	Did not attempt to reproduce	NO	No	No		YES		Orchiectomy	Absent		Right		YES	YES	12	7	No	M0	NX	T2		A7U4		2		336
TCGA-YU-A94D-01A	28	430.36.0	Nationwide Children's Hospital	TCGA-YU-A94D-F67066	E7C18C5D-39DF-4F9E-9769-02933995DAF4	TCGA-YU-A94D		M1a	N0		Stage IIIB	22	30		0	25	-4		NO	NO	A879E996-06E3-4C0D-B213-635E65AEDCBC	Normalization of Tumor Markers, but Residual Tumor Mass	Fathered > or = 1 child by natural conception	NO	No	No	Intermediate	YES		Orchiectomy	Absent		Right		NO	YES	12	10	No			T3		A94D	TUMOR FREE	21	0.9	1319
TCGA-2G-AAEW-01A	31	430.36.0	Nationwide Children's Hospital			TCGA-2G-AAEW		M0	N0	T1	Stage IS	22			0	129	-2		NO	NO	98315B92-9DDF-4CB7-9A07-A368D8E2E586	Normalization of Tumor Markers, but Residual Tumor Mass	Did not attempt to reproduce	NO	No	Yes; bilateral		YES		Orchiectomy	Present		Right	Inguinal		YES	12		No	M0	N0	T1		AAEW		5	53.5	176
TCGA-XE-AAO3-01A	33	430.36.0	Nationwide Children's Hospital	TCGA-XE-AAO3-F67580	33C39E56-689C-4F56-A12C-17777E2FB6D5	TCGA-XE-AAO3		M0	N0	T2	Stage I	22	6		0		-32	1			94B4A8CF-9913-4D2F-83E4-18A003AD9931			NO	No	No		YES		Orchiectomy	Absent	90	Right		NO	YES	12	11	No	M0	NX	T2		AAO3	TUMOR FREE
TCGA-XE-AAOF-01A	50	430.36.0	Nationwide Children's Hospital	TCGA-XE-AAOF-F67609	44A38622-1A95-4F42-B3F7-57B30F1F2E5A	TCGA-XE-AAOF		M0	N0	T1	Stage IA	22	6		0	36	-7	1			FE62B238-8582-46D8-ABBE-C4A1037382DD	No Measureable Tumor or Tumor Markers	Did not attempt to reproduce	YES	No	Yes; bilateral	Good	YES		Orchiectomy	Absent	90	Left	Non-palpable - high	NO	NO	12	11	No	M0	NX	T1		AAOF	TUMOR FREE	2.3	2.3	118
TCGA-W4-A7U2-01A	26	430.36.0	Nationwide Children's Hospital	TCGA-W4-A7U2-F61815	349781A5-BC7A-49E3-BCDB-22485BA614B2	TCGA-W4-A7U2		M0	N0	T1	Stage IA	22	7		0	96	-13		YES	NO	9D5C7FD6-6C41-495A-AEF3-B914D0D9C375	No Measureable Tumor or Tumor Markers	Fathered > or = 1 child by unspecified method	NO	No	No		YES		Orchiectomy	Absent		Left		NO	NO	12	7	No		NX	T1		A7U2	TUMOR FREE	3.27		452
TCGA-XY-A9T9-01A	37	430.36.0	Nationwide Children's Hospital	TCGA-XY-A9T9-F67747	02C4EC86-49D8-4895-89CF-D2E840EDDB29	TCGA-XY-A9T9		M0	NX	T1	Stage IS	22	11		0	11	-3				33A53BF3-37A5-4412-BD6A-B81F2A7941B3			NO	No	No		YES		Orchiectomy	Present		Left		NO	NO	12	11	No	M0	NX	T1		A9T9	TUMOR FREE	3.1	1	184
TCGA-SN-A84W-01A	30	430.36.0	Nationwide Children's Hospital	TCGA-SN-A84W-F62984	AF77B5AF-D115-4718-8EDE-2E0746EEF9C2	TCGA-SN-A84W		M0				22	29		0					YES	76F7BB42-32DC-4D8D-B2C4-B118E49DF76A	No Measureable Tumor or Tumor Markers	Fathered > or = 1 child by natural conception		No	No		YES		Orchiectomy			Left		NO	NO	12	7	No	M0	NX	T2		A84W	TUMOR FREE
TCGA-XE-AAOJ-01A	24	430.36.0	Nationwide Children's Hospital	TCGA-XE-AAOJ-F67612	DF53AEE4-AB4F-4CBE-BD55-25E3416E4396	TCGA-XE-AAOJ		M0	N0	T1	Stage IS	22	6		0	48	0	1	NO	NO	1537EDED-94D1-4F37-B785-E83B7274DE14	Normalization of Tumor Markers, but Residual Tumor Mass		NO	No	No	Intermediate	YES		Orchiectomy	Absent	90	Left		NO	NO	12	11	No	M0	NX	T1		AAOJ	TUMOR FREE	2150.5	14.4	158
TCGA-2G-AAF4-01A	30	430.36.0	Nationwide Children's Hospital	TCGA-2G-AAF4-F62223	72661597-D168-4421-9B8B-7F3E7F5C1F78	TCGA-2G-AAF4		M0	N0	T1	Stage IA	22	16		0	61	-2	0		NO	95C6A937-BB6F-47CE-8079-B662C8B5CC9A	No Measureable Tumor or Tumor Markers	Did not attempt to reproduce	NO	No	Yes; left testicle only		YES		Orchiectomy	Present	100	Right	Inguinal	NO	YES	12	7	No	M0	N0	T1		AAF4	TUMOR FREE	2		191
TCGA-2G-AAHP-01A	31	430.36.0	Nationwide Children's Hospital	TCGA-2G-AAHP-F63096	7B0E5153-549A-4185-8E61-639F5FC43D82	TCGA-2G-AAHP		M0	N0	T2	Stage IS	22	31		0	36	-6	0	YES	NO	23AB35FE-0BF3-471F-9799-FB955F7CBBD7	No Measureable Tumor or Tumor Markers	Did not attempt to reproduce	NO	No	No		YES		Orchiectomy	Present	100	Right		NO	YES	12	7	No	M0	N0	T2		AAHP	TUMOR FREE			279
TCGA-2G-AAHP-05A	31	430.36.0	Nationwide Children's Hospital	TCGA-2G-AAHP-F63096	7B0E5153-549A-4185-8E61-639F5FC43D82	TCGA-2G-AAHP		M0	N0	T2	Stage IS	22	31		0	36	-6	0	YES	NO	23AB35FE-0BF3-471F-9799-FB955F7CBBD7	No Measureable Tumor or Tumor Markers	Did not attempt to reproduce	NO	No	No		YES		Orchiectomy	Present	100	Right		NO	YES	12	7	No	M0	N0	T2		AAHP	TUMOR FREE			279
TCGA-2G-AAH3-01A	20	430.36.0	Nationwide Children's Hospital	TCGA-2G-AAH3-F63024	1F10CD8B-E76B-44E1-9A81-CFBCEF2BF21C	TCGA-2G-AAH3		M0	N0	T2	Stage I	22	30		0	11	-3	0	YES	NO	3D320758-A336-45AE-B88A-93BBF4FE1DE7	No Measureable Tumor or Tumor Markers	Did not attempt to reproduce	NO	No	No		YES		Orchiectomy	Present	100	Right		NO	YES	12	7	No	M0	NX	T2		AAH3	TUMOR FREE	3		169
TCGA-2G-AAFH-01A	38	430.36.0	Nationwide Children's Hospital	TCGA-2G-AAFH-F62262	5A198120-C601-4A00-B3A7-7CDE0E17BD2E	TCGA-2G-AAFH		M0	N2	T1	Stage IIB	22	17		0	15	-2	0		NO	9276701E-58C7-4421-8273-8E13A4505F11	No Measureable Tumor or Tumor Markers	Did not attempt to reproduce	NO	No	Yes; left testicle only	Good	YES		Orchiectomy	Absent	90	Left	Inguinal	NO	NO	12	7	No	M0	N2	T1		AAFH	TUMOR FREE	1.6		255
TCGA-2G-AAG0-01A	23	430.36.0	Nationwide Children's Hospital	TCGA-2G-AAG0-F63207	B37908E3-1F2E-4670-922B-B4287321ED6C	TCGA-2G-AAG0	Metachronous	M0	N0	T2	Stage IS	22	4	-18	0	23	-4	0	NO	YES	19738126-35D2-4CC7-A9EE-15FEAD8299E7	No Measureable Tumor or Tumor Markers	Did not achieve pregnancy following > or = 12 months of unprotected intercourse	NO	No	Yes; right testicle only		YES		Orchiectomy	Present	90	Bilateral	Inguinal	NO	YES	12	8	Yes	M0	N0	T2		AAG0	TUMOR FREE	3	1.6	275
TCGA-2G-AAKH-01A	19	430.36.0	Nationwide Children's Hospital	TCGA-2G-AAKH-F63262	7AADDE26-940A-431A-BAAE-E182E4497BBB	TCGA-2G-AAKH		M0	N1	T2	Stage II	22	5		0	24	-9	0	NO	NO	9D48DCA6-D03B-4007-AB25-47B4585AC5A2	No Measureable Tumor or Tumor Markers	Did not attempt to reproduce	NO	No		Good	YES		Orchiectomy	Present	90	Right		NO	NO	12	8	No	M0	NX	T1		AAKH	TUMOR FREE	5.7		295
TCGA-2G-AAEX-01A	38	430.36.0	Nationwide Children's Hospital	TCGA-2G-AAEX-F62248	3678B09E-617C-41CE-B307-C64380F927E3	TCGA-2G-AAEX		M0	N0	T1	Stage IS	22	16		0	27	-3	0	NO	NO	FFE9A2F0-847C-4BED-BED6-B7ED94233236	No Measureable Tumor or Tumor Markers	Fathered > or = 1 child by natural conception	NO	No	Yes; left testicle only		YES		Orchiectomy	Present	100	Left	Inguinal	NO	NO	12	7	No	M0	N0	T1		AAEX	TUMOR FREE		4	144
TCGA-2G-AALY-01A		430.36.0	Nationwide Children's Hospital			TCGA-2G-AALY						1									15748239-4EEA-4A89-933C-CB060C11E001																7							AALY
TCGA-2G-AAF0-01A		618.0.0	Nationwide Children's Hospital			TCGA-2G-AAF0						6									3F1029E8-5BC4-4244-B93B-048E7DCC8A79																11							AAF0
TCGA-2G-AALN-01A		430.36.0	Nationwide Children's Hospital			TCGA-2G-AALN						1									32862C32-F784-47A7-A8EE-41D90E2AC323																7							AALN
TCGA-2G-AAKJ-01A		618.0.0	Nationwide Children's Hospital			TCGA-2G-AAKJ						6									248E7C62-A3D8-4542-B34B-90A52B0C91AE																11							AAKJ
TCGA-XE-AANN-01A		618.0.0	Nationwide Children's Hospital			TCGA-XE-AANN						6									227D51F4-FE86-461B-871F-C790C4FD8A12																11							AANN
TCGA-2G-AALQ-01A		430.36.0	Nationwide Children's Hospital			TCGA-2G-AALQ						1									6C9822CD-6250-4877-A489-C40497F8F063																7							AALQ
TCGA-2G-AAI6-01A		618.0.0	Nationwide Children's Hospital			TCGA-2G-AAI6						6									4609B25C-9ADF-42C3-9374-A5FFFDE62F1A																11							AAI6
TCGA-2G-AALZ-01A		430.36.0	Nationwide Children's Hospital			TCGA-2G-AALZ						1									EFA51EC5-3303-4B76-A6B4-5E774D859FE0																7							AALZ
TCGA-2G-AALG-01A		430.36.0	Nationwide Children's Hospital			TCGA-2G-AALG						1									E1B374C3-D262-484C-B474-D0A141AE3141																7							AALG
TCGA-2G-AAG2-01A		618.0.0	Nationwide Children's Hospital			TCGA-2G-AAG2						6									43394C75-A265-49F4-89E8-193C9B414738																11							AAG2
TCGA-2G-AALO-01A		430.36.0	Nationwide Children's Hospital			TCGA-2G-AALO						1									BF1A4B6B-D4CB-4CDD-8DBE-F5ED3F98E7DD																7							AALO
TCGA-2G-AALW-01A		430.36.0	Nationwide Children's Hospital			TCGA-2G-AALW						1									4423CB99-3BF4-4C72-858E-0D526F7352F9																7							AALW
TCGA-2G-AALR-01A		430.36.0	Nationwide Children's Hospital			TCGA-2G-AALR						1									911FC5B8-DD5C-4910-9CBE-E76A03414641																7							AALR
TCGA-2G-AAM4-01A		430.36.0	Nationwide Children's Hospital			TCGA-2G-AAM4						1									08F76A55-CCFB-4412-9247-700175806054																7							AAM4
TCGA-XE-AAOQ-01A		618.0.0	Nationwide Children's Hospital			TCGA-XE-AAOQ						6									7B2579A1-E633-422A-BA8A-5E27D1E07F42																11							AAOQ
TCGA-2G-AALT-01A		430.36.0	Nationwide Children's Hospital			TCGA-2G-AALT						1									E4BC5F0D-76AB-445F-9077-6EE778389511																7							AALT
TCGA-2G-AAHI-01A		618.0.0	Nationwide Children's Hospital			TCGA-2G-AAHI						6									C11FBC47-ADF2-47C7-8D58-38BE4856F8E8																11							AAHI
TCGA-2G-AAM3-01A		430.36.0	Nationwide Children's Hospital			TCGA-2G-AAM3						1									EC6DA668-8F1A-4BF9-BF86-D368A5CA7B5D																7							AAM3
TCGA-2G-AAKO-01A		430.36.0	Nationwide Children's Hospital			TCGA-2G-AAKO						1									A807166F-0CFE-4834-A5C3-AF56BF196B15																7							AAKO
TCGA-2G-AAKO-05A		430.36.0	Nationwide Children's Hospital			TCGA-2G-AAKO						1									A807166F-0CFE-4834-A5C3-AF56BF196B15																7							AAKO
TCGA-2G-AALF-01A		430.36.0	Nationwide Children's Hospital			TCGA-2G-AALF						1									3CCDB022-D352-48BC-B921-2C3D3234152E																7							AALF
TCGA-2G-AALS-01A		430.36.0	Nationwide Children's Hospital			TCGA-2G-AALS						1									92893D94-62A0-4154-AC98-ED332C220A22																7							AALS
TCGA-YU-AA60-01A		618.0.0	Nationwide Children's Hospital			TCGA-YU-AA60						6									A72CAE48-8329-4FD6-9DA8-091EE49EABB3																11							AA60
TCGA-2G-AALX-01A		430.36.0	Nationwide Children's Hospital			TCGA-2G-AALX						1									96201753-BCFB-4BF2-806E-25B51208F91C																7							AALX
TCGA-2G-AAM2-01A		430.36.0	Nationwide Children's Hospital			TCGA-2G-AAM2						1									C5A1FB3F-299D-4281-BCBC-A5084D186E06																7							AAM2
[truncated: 83 more columns]
